# Supplementary material
Source: PubMed Central journal article supplement (PMC6439609)
Supplement: jama-e190234-s003.pdf [file jama-e190234-s003.pdf]

Subramaniam B, Shankar P, Shaefi S, et al. Effect of postoperative intravenous acetaminophen vs placebo combined with propofol or dexmedetomidine on postoperative in-hospital delirium among older patients following cardiac surgery: the DEXACET randomized clinical trial [published February 19, 2019]. *JAMA*. doi:10.1001/jama.2019.0234

## Data Sharing Statement

### Data

**Data available:** Yes

**Data types:** Deidentified participant data

**How to access data:** Proposals may be submitted to the corresponding author, Dr. Balachundhar Subramaniam by emailing [bsubrama@bidmc.harvard.edu](mailto:bsubrama@bidmc.harvard.edu).

**When available:** With publication

### Supporting Documents

**Document types:** None

### Additional Information

**Who can access the data:** Data will be made available upon reasonable request to researchers who provide a methodologically sound proposal and whose use of the data has been approved the study authors.

**Types of analyses:** Any

**Mechanisms of data availability:** De-identified individual participant data collected during the trial will be made available upon reasonable request.
